# Supplementary material
Source: PubMed Central journal article supplement (PMC3608352)
Supplement: supp_cws172_cws172supp.pdf [file supp_cws172_cws172supp.pdf]

## SUPPLEMENTARY MATERIAL

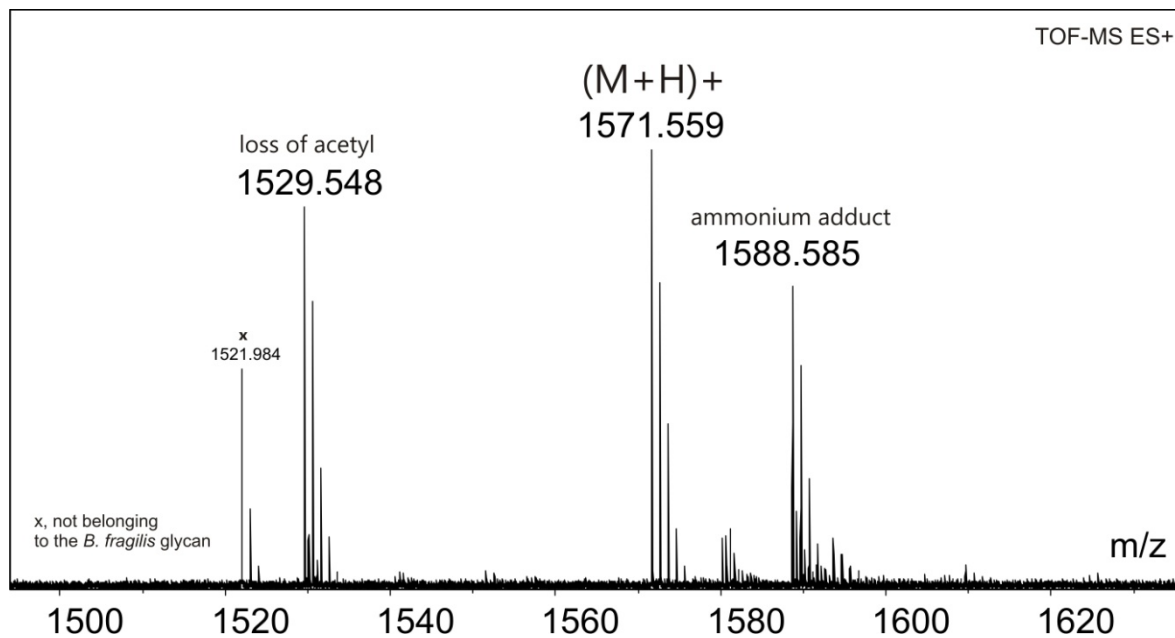

**Fig S1.** High resolution ESI-TOF-MS spectrum of the Borohydride-reduced *B. fragilis* protein *O*-glycan showing a parent mass of 1571.56 Da. A partial loss of acetylation was observed. Mass analysis was performed on the Bruker Maxis 4G Q-TOF instrument.

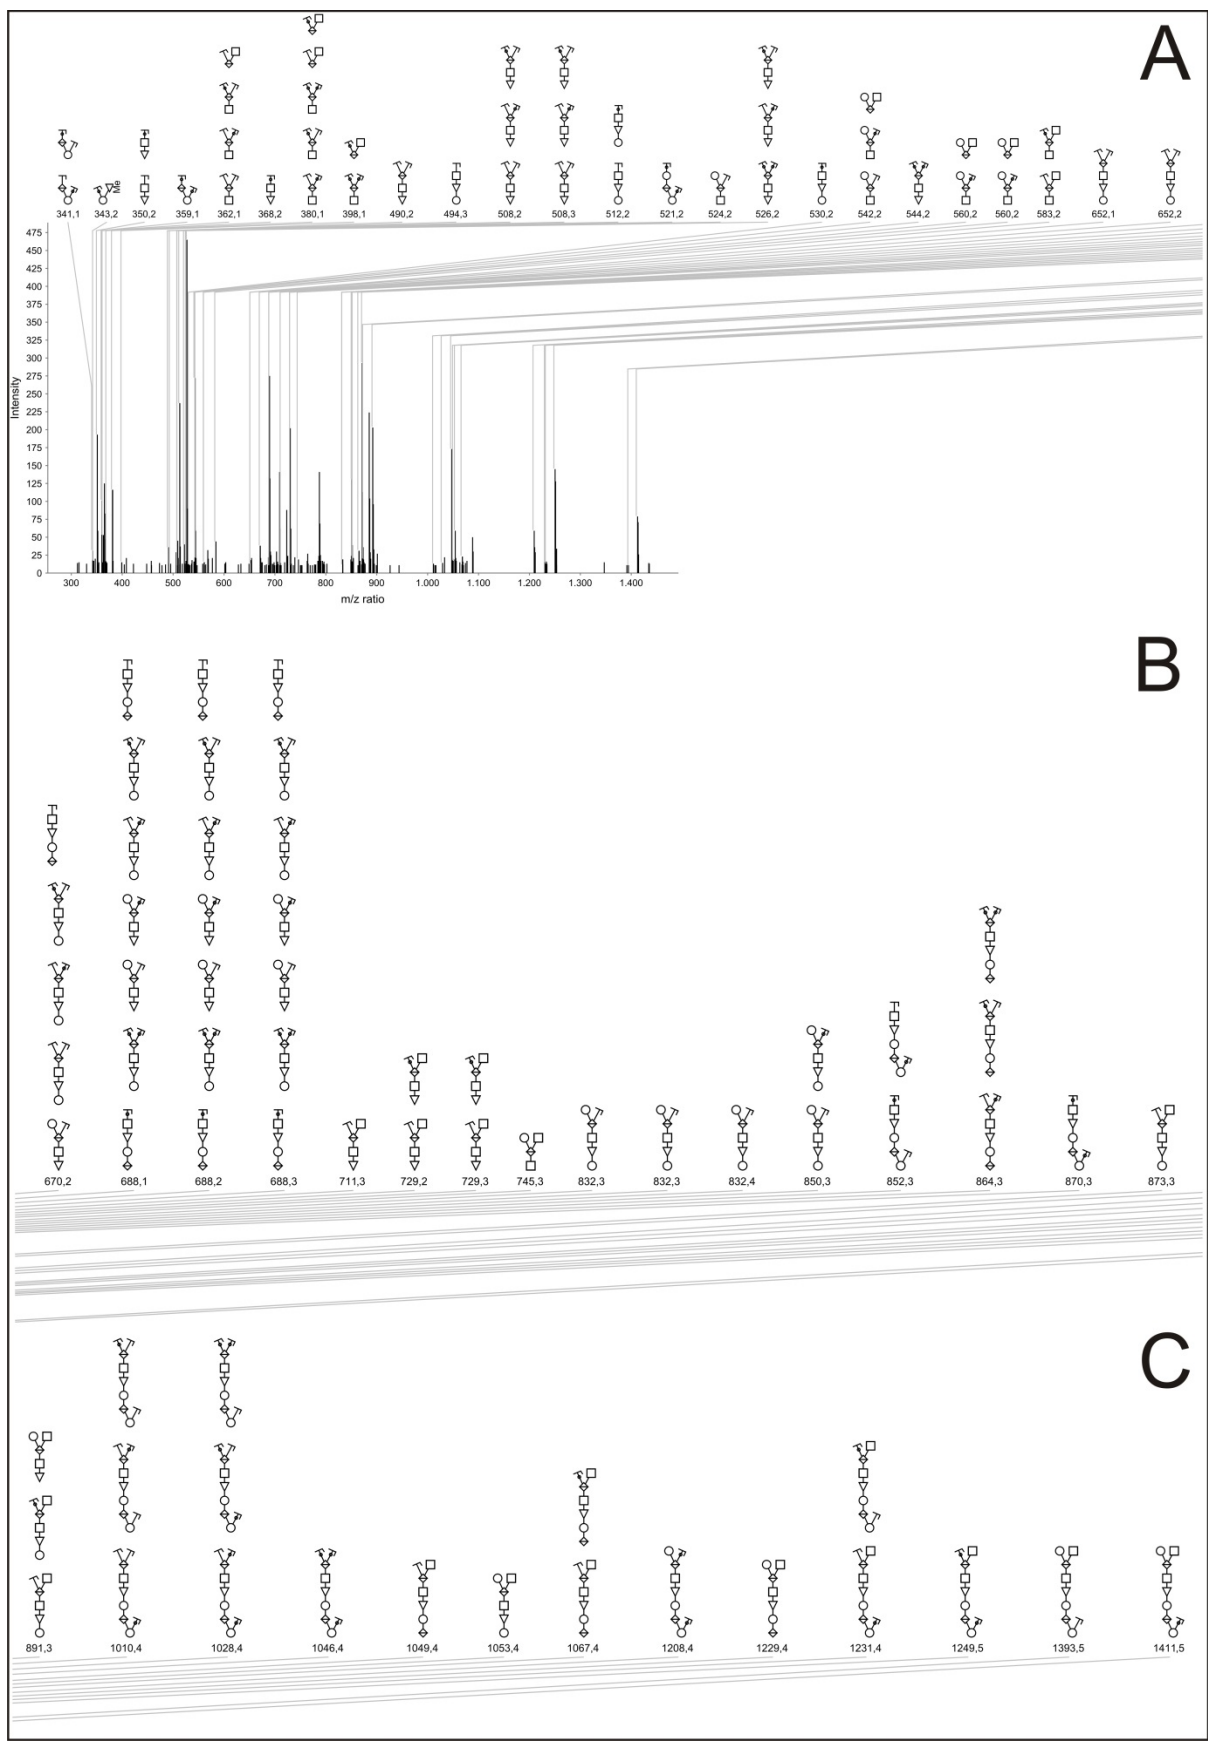

**Fig. S2.** ABC. Annotation of fragment ions derived from the *B. fragilis* O-glycan according to GlycoWorkbench (Ceroni et al. 2008) and the potential *B. fragilis* glycan structure as assumed by ESI-MS/MS experiments.

Ceroni A, Maass K, Geyer H, Geyer R, Dell A, Haslam SM. 2008. GlycoWorkbench: A tool for the computer-assisted annotation of mass spectra of glycans. *J Proteome Res.* 7:1650-1659.

**Table S1.** Exact masses evaluated for sugar residues of the *B. fragilis* O-glycan after MS/MS experiments of the free reduced glycan and glycopeptides. Mass deviation to the supposed corresponding sugar residue is expressed in milli Dalton (mDa).

| <b>possible sugar</b>          | <b>measured</b> | <b>calculated</b> | <b>delta mDa</b> |
|--------------------------------|-----------------|-------------------|------------------|
| <b>O-linking hexose**</b>      | 162,0534        | 162,0528          | 0,60             |
| <b>methyl-deoxyhexose**</b>    | 160,074         | 160,07355         | 0,45             |
| <b>„inner“ hexuronic acid*</b> | 176,0311        | 176,0321          | -1,00            |
| <b>„middle“ hexose**</b>       | 162,0540        | 162,0528          | 1,20             |
| <b>deoxyhexose**</b>           | 146,0584        | 146,0579          | 0,50             |
| <b>„inner“ HexNAc**</b>        | 203,0873        | 203,0794          | 7,90             |
| <b>„outer“ hexuronic acid*</b> | 176,0326        | 176,0321          | 0,50             |
| <b>„outer HexNAc“ */***</b>    | 203,0938        | 203,0794          | 14,40            |
| <b>outer hexose*</b>           | 162,0569        | 162,0528          | 4,10             |

\*calculated from borohydride reduced oligosaccharides

\*\*calculated from glycopeptides

\*\*\*The presence of HexNAc is uncertain; the residue shows a partial loss of 42 Da, rather indicative of O-acetylation

**Table S2.** Summary of all glycopeptides as determined by heterologous glycosylation experiments.

**TfsA in *B. fragilis*, log<sub>e</sub> = -146.5, identified peptides:32**

| Glycopeptide                                  | Peptide mass [M+H] <sup>+</sup> | Glycopeptide mass (measured) | Deconvoluted glycopeptide mass / attached glycan portion | Position |
|-----------------------------------------------|---------------------------------|------------------------------|----------------------------------------------------------|----------|
| NQT <u>DSAR</u>                               | 791.36                          | 1171.5 (M+2H) <sup>2+</sup>  | 2341/1550.64                                             | 939-945  |
| TCGAS <u>DSVR</u>                             | 952.40                          | 1252.0 (M+2H) <sup>2+</sup>  | 2502/1550.6                                              | 191-199  |
| LSFVPAIHAG <u>DTL</u> YILNGRPIEAFIQK          | 2983.64                         | 1512.1 (M+3H) <sup>3+</sup>  | 4533.3/1550.66                                           | 968-994  |
| <u>DTL</u> YVLK                               | 964.57                          | n.d.*                        | -                                                        | 602-609  |
| TYFQLVIP <u>DSL</u> R                         | 1451.79                         | n.d.*                        | -                                                        | 613-624  |
| LVYYPSE <u>DSL</u> VINVR                      | 1766.93                         | n.d.*                        | -                                                        | 332-346  |
| FNTTDESAIGSDNP <u>DTL</u> KFHR                | 1924.87                         | n.d.*                        | -                                                        | 804-821  |
| HLDTDWAIYV <u>DTA</u> YVNR                    | 2051.98                         | n.d.*                        | -                                                        | 881-897  |
| IDLSNFHYTDTITGLPIT <u>DTVR</u>                | 2554.28                         | n.d.*                        | -                                                        | 727-748  |
| FLAMDEFGYITLV <u>DSA</u> FIYGASVPADSSYR       | 3305.57                         | n.d.*                        | -                                                        | 60-89    |
| EDGGIAEAT <u>DSL</u> NWFAYTFQYLSGLSGNHYMGFDEK | 4033.79                         | n.d.*                        | -                                                        | 562-597  |

**TfsB in *B. fragilis*, log<sub>e</sub> = -137, identified peptides: 20**

|                                                  |         |                              |                 |           |
|--------------------------------------------------|---------|------------------------------|-----------------|-----------|
| FAT <u>DSVVR</u>                                 | 894.46  | 1223.06 (M+2H) <sup>2+</sup> | 2444.12/1550.66 | 469-476   |
| LMV <u>DTL</u> PR                                | 944.5   | 1248.09 (M+2H) <sup>2+</sup> | 2494.18/1550.68 | 489-496   |
| TAIYV <u>DTA</u> YVNR                            | 1385.70 | 1468.69 (M+2H) <sup>2+</sup> | 2935.38/1550.68 | 1063-1074 |
| AIT <u>DSTR</u>                                  | 763.39  | n.d.*                        | -               | 462-468   |
| GMYLINAT <u>DSA</u> K                            | 1283.63 | n.d.*                        | -               | 1114-1125 |
| <u>DTA</u> TVNLYAFNYR                            | 1547.75 | n.d.*                        | -               | 751-763   |
| <u>IDTV</u> NVDAGHYKPYGYGVK                      | 2096.04 | n.d.*                        | -               | 803-821   |
| <u>DSL</u> IYVQGTNCFDIAYFR                       | 2182.03 | n.d.*                        | -               | 785-802   |
| YLYV <u>DTV</u> YNSGNSQFLK                       | 2174.04 | n.d.*                        | -               | 397-414   |
| EGANDGYYYLQV <u>DSM</u> VAYDK                    | 2301.00 | n.d.*                        | -               | 53-72     |
| GVTLYMG <u>PSA</u> GQNALWIDVMGR                  | 2451.18 | n.d.*                        | -               | 104-126   |
| GQYLHVPLYSAH <u>DSA</u> VWVFLDK                  | 2545.29 | n.d.*                        | -               | 610-631   |
| GGRPLVSYLDET <u>MDTV</u> AVLVG <u>DTL</u> NK     | 2763.42 | n.d.*                        | -               | 232-257   |
| MVYYPSG <u>DSI</u> YINPFSATYLPYDPK               | 3002.42 | n.d.*                        | -               | 436-461   |
| GTGHKQPQYMLMIRPTIVE <u>DTL</u> GCCDDNGDLTIPLPGYR | 4257.11 | n.d.*                        | -               | 1075-1112 |

**Bf2494 in *T. forsythia*, log<sub>e</sub> = -217.8, identified peptides: 32\*\*\***

|                           |         |                                                         |                 |         |
|---------------------------|---------|---------------------------------------------------------|-----------------|---------|
| KPY <u>DTL</u> K          | 864.48  | 861.03 (M+3H) <sup>3+</sup><br>(- terminal Fuc, - Me**) | 2580.09/1716.61 | 76-82   |
| <u>GDTAK</u>              | 491.25  | n.d.*                                                   | -               | 222-226 |
| <u>DTIL</u> PQVAYYATLAADR | 1880.98 | n.d.*                                                   | -               | 170-186 |

**Bf3567 in *T. forsythia*, log<sub>e</sub> = -338.6, identified peptides: 24\*\*\***

|                            |         |                                                         |                 |         |
|----------------------------|---------|---------------------------------------------------------|-----------------|---------|
| LGDISL <u>DTV</u> AVR      | 1258.70 | 1041.14 (M+3H) <sup>3+</sup><br>(-Me**)                 | 3120,4/1862.6   | 200-211 |
| <u>GDS</u> INAK            | 704.36  | 807.65 (M+3H) <sup>3+</sup><br>(- terminal Fuc, - Me**) | 2419.96/1716.61 | 138-144 |
| IEIPATAVL <u>DSI</u> IYDNR | 2016.10 | n.d.*                                                   | -               | 323-340 |

\*neither free peptide nor glycosylated form was detected, possibly due to chromatographic properties

\*\*methyl group is missing on ManNAcCONH<sub>2</sub> residue

\*\*\* IonTrap MS/MS data were used for calculating X! TANDEM log<sub>e</sub> values
